# Supplementary material for: A Survey of Mobile Apps for the Care Management of Patients with Dementia
Source: MDPI journal article supplement (doi:10.3390/healthcare10071173), 2022-06-23
Supplement: s1 [file s1]

Supplement Table S1. Summary of included APP characteristics.

| Code | APP Name                                 | Country   | Developer                     | Affiliations             | Website                                                                                                                                                                             | Last Update | Download |
|------|------------------------------------------|-----------|-------------------------------|--------------------------|-------------------------------------------------------------------------------------------------------------------------------------------------------------------------------------|-------------|----------|
| 87   | Accessible Alzheimer's and Dementia Care | US        | AHCGLOBAL, INC.               | Commercial               | <a href="https://apps.apple.com/us/app/accessible-alzheimers-and-dementia-care/id1193296364">https://apps.apple.com/us/app/accessible-alzheimers-and-dementia-care/id1193296364</a> | NA          | 500+     |
| 88   | Alzheimer's and Dementia Care            | US        | Accessible home health care   | Commercial               | <a href="https://play.google.com/store/apps/details?id=tritantra.ahc2">https://play.google.com/store/apps/details?id=tritantra.ahc2</a>                                             | NA          | 500+     |
| 89   | Alzheimer's Daily Companion              | US        | Home Instead Senior Care      | Commercial               | <a href="https://apps.apple.com/us/app/alzheimers-daily-companion/id696976537">https://apps.apple.com/us/app/alzheimers-daily-companion/id696976537</a>                             | NA          | 5000+    |
| 90   | Alzheimer's Manager                      | US        | Point of Care LLC             | Commercial               | <a href="https://apps.apple.com/tw/app/alzheimers-manager/id1364064302">https://apps.apple.com/tw/app/alzheimers-manager/id1364064302</a>                                           | 20220302    | 0        |
| 91   | Cogni Care                               | UK        | CogniHealth Ltd               | Commercial University    | <a href="https://apps.apple.com/us/app/cogni/id902479424">https://apps.apple.com/us/app/cogni/id902479424</a>                                                                       | 20210107    | 5000+    |
| 92   | Dementia Advisor                         | Canada    | Sinai Health System           | Government Health System | <a href="https://apps.apple.com/us/app/dementia-advisor/id1156249743">https://apps.apple.com/us/app/dementia-advisor/id1156249743</a>                                               | 20190920    | 1000+    |
| 93   | Dementia Caregiver Solutions             | Canada    | Lorenzo Gentile               | Commercial               | <a href="https://apps.apple.com/tw/app/dementia-caregiver-solutions/id969874075?l=zh">https://apps.apple.com/tw/app/dementia-caregiver-solutions/id969874075?l=zh</a>               | 20150710    | 0        |
| 94   | Dementia Stages Ability Model            | US        | Positive Approach, LLC        | Commercial               | <a href="https://apps.apple.com/us/app/dementia-stages-ability-model/id1528128949">https://apps.apple.com/us/app/dementia-stages-ability-model/id1528128949</a>                     | NA          | 1000+    |
| 95   | DementiAssist                            | US        | Baylor Scott and White Health | University               | <a href="https://apptopia.com/ios/app/926516122/about">https://apptopia.com/ios/app/926516122/about</a>                                                                             | 20190518    | 5000+    |
| 96   | DemKonnnect                              | UK        | Nightingales Medical Trust    | NGO                      | <a href="https://play.google.com/store/apps/details?id=mobi.appyapp.demkonnnect">https://play.google.com/store/apps/details?id=mobi.appyapp.demkonnnect</a>                         | 20220609    | 500+     |
| 97   | Inspo-Alzheimer'sCare giving             | US        | Inspo Labs                    | NA                       | <a href="https://apps.apple.com/hk/app/inspo-alzheimers-caregiving/id1545633090">https://apps.apple.com/hk/app/inspo-alzheimers-caregiving/id1545633090</a>                         | 20220226    | 0        |
| 98   | Remember Me-Caregiver                    | US        | Daniel Leal                   | NA                       | <a href="https://apps.apple.com/tw/app/remember-me-caregiver/id1481000591">https://apps.apple.com/tw/app/remember-me-caregiver/id1481000591</a>                                     | 20191005    | 0        |
| 99   | Care4Dementia                            | Australia | Univ of New South Wales       | University               | <a href="https://apps.apple.com/tw/app/care4dementia/id1029281368">https://apps.apple.com/tw/app/care4dementia/id1029281368</a>                                                     | NA          | 0        |
